# Supplementary material for: Multiple knockout mouse and embryonic stem cell models reveal the role of miR-124a in neuronal maturation
Source: PubMed Central journal article supplement — J Biol Chem. 2022 Jul 20;298(9):102293. doi: 10.1016/j.jbc.2022.102293 (PMC9418502; doi:10.1016/j.jbc.2022.102293), 2022-07-20
Supplement: mmc1.pdf [file mmc1.pdf]

## Supporting Information

Multiple knockout mouse and embryonic stem cell models reveal the role of *miR-124a* in neuronal maturation

Taro Chaya<sup>1,#</sup>, Yamato Maeda<sup>1,#</sup>, Ryo Sugimura<sup>1</sup>, Daisuke Okuzaki<sup>2</sup>, Satoshi Watanabe<sup>1</sup>, Leah R. Varner<sup>1</sup>, Daisuke Motooka<sup>2</sup>, Daichi Gyoten<sup>1</sup>, Haruka Yamamoto<sup>1</sup>, Hidemasa Kato<sup>3</sup>, Takahisa Furukawa<sup>1,\*</sup>

<sup>#</sup>These authors contributed equally to this work.

<sup>1</sup>Laboratory for Molecular and Developmental Biology, Institute for Protein Research, Osaka University, Osaka 565-0871, Japan.

<sup>2</sup>Genome Information Research Center, Research Institute for Microbial Diseases, Osaka University, Osaka 565-0871, Japan

<sup>3</sup>Department of Functional Histology, Ehime University Graduate School of Medicine, Ehime 791-0295, Japan

### Corresponding author:

\*Author for correspondence

E-mail: takahisa.furukawa@protein.osaka-u.ac.jp

Laboratory for Molecular and Developmental Biology, Institute for Protein Research, Osaka University, 3-2 Yamadaoka, Suita, Osaka, 565-0871, Japan

Phone: +81-6-6879-8631

Fax: +81-6-6879-8633

### Material included:

Fig. S1: Generation of *miR-124a-2<sup>-/-</sup>* and *-3<sup>-/-</sup>* mice.

Fig. S2: Coronal sections from the WT control, *miR-124a-2<sup>-/-</sup>*, and *-3<sup>-/-</sup>* brains.

Fig. S3: Thickness of the cerebral cortex in the WT control and *miR-124a-1<sup>-/-</sup>* mouse brains.

Fig. S4: Gene expression analysis of glial markers in the *miR-124a-1/2* DKO mouse brain.

Fig. S5: Expression levels of genes encoding transcription regulators in the *miR-124a-1/2* DKO mouse brain.

Fig. S6: The genomic DNA sequences of mutant alleles in *miR-124a-1/2/3* TKO ES clones #21, #71, and #93.

Fig. S7: Phase-contrast view of *miR-124a-1/2/3* TKO cells during induced neuronal differentiation.

Fig. S8: Gene expression analysis of glial markers in neuronal differentiation-induced *miR-124a-1/2/3* TKO cells.

Table S1: Sequences of DNA oligonucleotides (5' → 3')

## A miR-124a-2

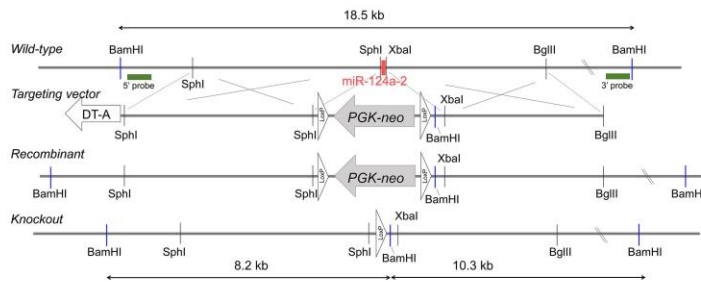

## B miR-124a-3

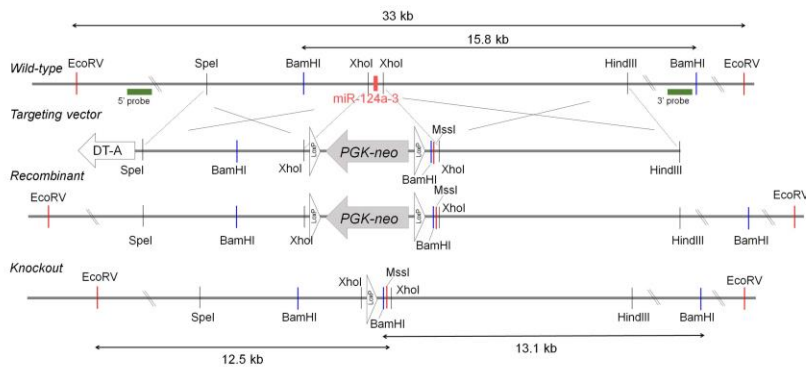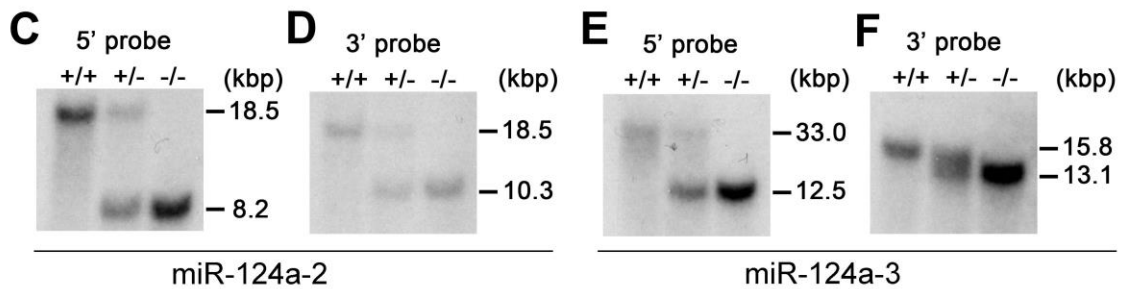

## Figure S1

### Figure S1. Generation of *miR-124a-2*<sup>-/-</sup> and *-3*<sup>-/-</sup> mice.

(A, B) Diagrams of the targeting vectors and the *miR-124a-2*<sup>-/-</sup> and *-3*<sup>-/-</sup> alleles. The *miR-124a-2*<sup>-/-</sup> (A) and *-3*<sup>-/-</sup> (B) alleles are shown. Genomic regions encoding *miR-124a-2* and *-3* precursors are replaced by floxed *PGK-neo* cassettes.

(C-F) Southern blot analysis of genomic structure of *miR-124a-2* and *-3* loci. BamHI- (C, D) or EcoRV/MspI-digested (E) genomic DNA was hybridized with 5'(C, E) and 3'

probes (D, F) for *miR-124a-2* (C, D) and *-3* loci (E, F). The 5' probe of *miR-124a-2* detected 18.5-kb WT and 8.2-kb mutant bands (C). The 3' probe of *miR-124a-2* detected 18.5-kb WT and 10.3-kb mutant bands (D). The 5' probe of *miR-124a-3* detected 33.0-kb WT and 12.5-kb mutant bands (E). The 3' probe of *miR-124a-3* detected 15.8-kb WT and 13.1-kb mutant bands (F).

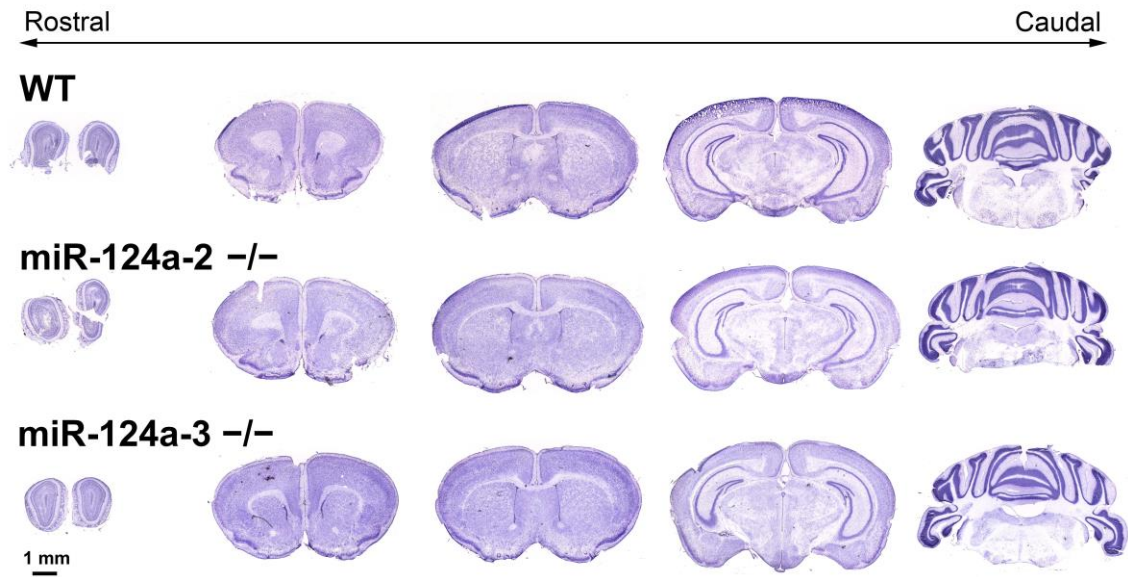

**Figure S2**

**Figure S2. Coronal sections from the WT control, *miR-124a-2*<sup>-/-</sup>, and *-3*<sup>-/-</sup> brains.**

Nissl staining of serial brain sections arranged from rostral to caudal of the WT control, *miR-124a-2*<sup>-/-</sup>, and *-3*<sup>-/-</sup> mice at 2M. Scale bar, 1 mm.

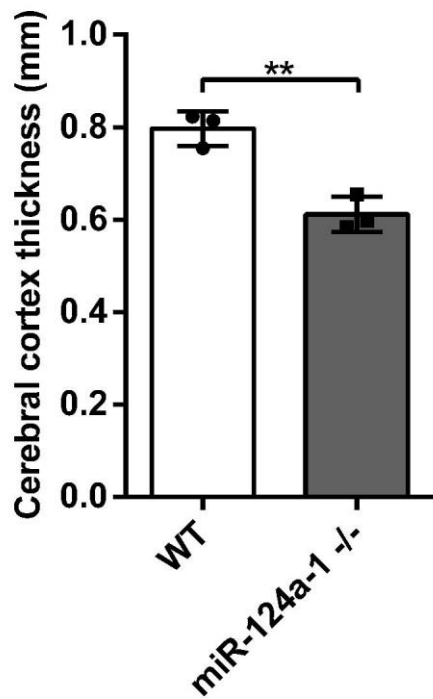

## Figure S3

**Figure S3. Thickness of the cerebral cortex in the WT control and *miR-124a-1*<sup>-/-</sup> mouse brains.**

The thickness of the cerebral cortex in the WT control and *miR-124a-1*<sup>-/-</sup> brains was measured (n = 3 per each genotype). Data are presented as the mean ± SD. \*\**p* < 0.01 (unpaired t-test).

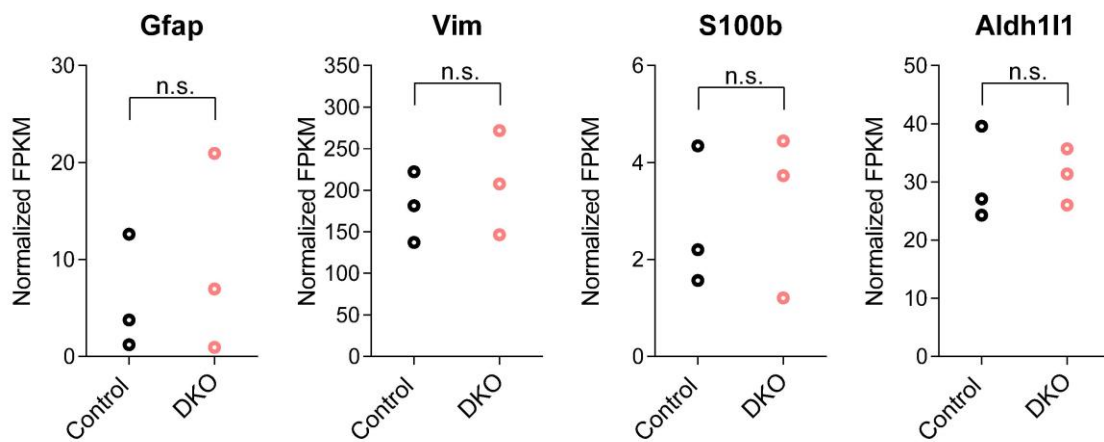

**Figure S4**

**Figure S4. Gene expression analysis of glial markers in the *miR-124a-1/2* DKO mouse brain.**

Gene expression levels of *Gfap*, *Vim*, *S100b*, and *Aldh111* (radial glia and/or astrocyte markers) in the control and *miR-124a-1/2* DKO brains at E17.5. n.s., not significant (unpaired t-test), n = 3 per genotype.

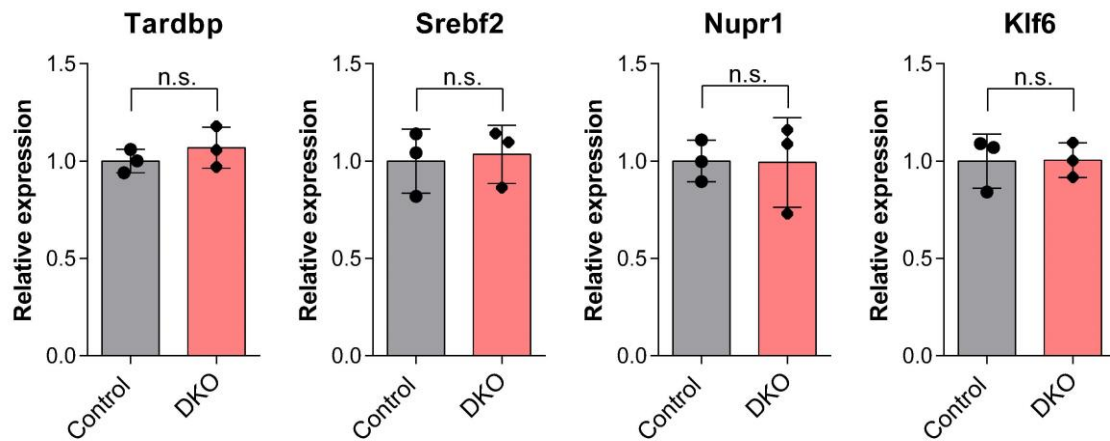

**Figure S5**

**Figure S5. Expression levels of genes encoding transcription regulators in the *miR-124a-1/2* DKO mouse brain.**

Quantitative RT-PCR analysis of the *Tardbp*, *Srebf2*, *Nupr1*, and *Klf6* mRNAs in the control and *miR-124a-1/2* DKO brains at E17.5. Data are presented as the mean  $\pm$  SD. n.s., not significant (unpaired t-test), n = 3 per genotype.



### miR-124a-1

WT: 5' TGTCCATACAATTAAGGCACGCGGTGAATGCCAAGAATGGGGCTG 3'

#21 Allele1: 5' TGTCCATACAATTAAGG-----TGAATGCCAAGAATGGGGCTG 3'  
Allele2: 5' TGTCCATACAATTAAGGTTGGACGCGGTGAATGCCAAGAATGGGGCTG 3'

#71 Allele1: 5' TGTCCATACAATTAAGGC-GGCGGTGAATGCCAAGAATGGGGCTG 3'  
Allele2: 5' TGTCCATACAATTA-----TGCCAAGAATGGGGCTG 3'

#93 Allele1: 5' TGTCCATACAATTAAGG-----TGAATGCCAAGAATG 3'  
Allele2: 5' TGTCCATACAATTAAG-ACGCGGTGAATGCCAAGAATGGGGCTG 3'

Mature miR-124a  
Deletion  
Insertion

### miR-124a-2

WT: 5' CGGACCTTGATTTAATGTCATACAATTAAGGCACGCGGTGAATGCCAAGAGCGGAGCCTACGGCTGCACTTGAA 3'

#21 Allele1: 5' CGGACCTTGATTTAATGTCATACAATTAAGGC----GGTGAATGCCAAGAGCGGAGCCTACGGCTGCACTTGAA 3'  
Allele2: 5' -----307 bp del----- 3'

#71 Allele1: 5' CGGACC-----CACGCGGTGAATGCCAAGAGCGGAGCC 3'  
Allele2: 5' -----365 bp del----- 3'

#93 Allele1: 5' CGGACCTTGATTTAATGTCATACAATTAAGGC----GGTGAATGCCAAGAGCGGAGCCTACGGCTGCACTTGAA 3'  
Allele2: 5' -----704 bp del----- 3'

### miR-124a-3

WT: 5' CTATACAATTAAGGCACGCGGTGAATGCCAAGAG 3'

#21 Allele1: 5' CTATACAATTAAGGC----GGTGAATGCCAAGAG 3'  
Allele2: 5' -----183 bp del----- 3'

#71 Allele1: 5' CTATACAATTAAGG-----TGAATGCCAAGAG 3'  
Allele2: 5' -----107 bp del----- 3'

#93 Allele1: 5' CTATACAATTAT---ACGCGGTGAATGCCAAGAG 3'  
Allele2: 5' CTATACAATTAAATGTCAGTAGGGACCCCTCGGTGAATGCCAAGAG 3'

## Figure S6

**Figure S6. The genomic DNA sequences of mutant alleles in *miR-124a-1/2/3* TKO ES clones #21, #71, and #93.**

The mature *miR-124a* sequence is indicated in red. Deletion and insertion are shown in blue and green, respectively. Biallelic mutations in all three *miR-124a* genes were identified in clones #21, #71, and #93.

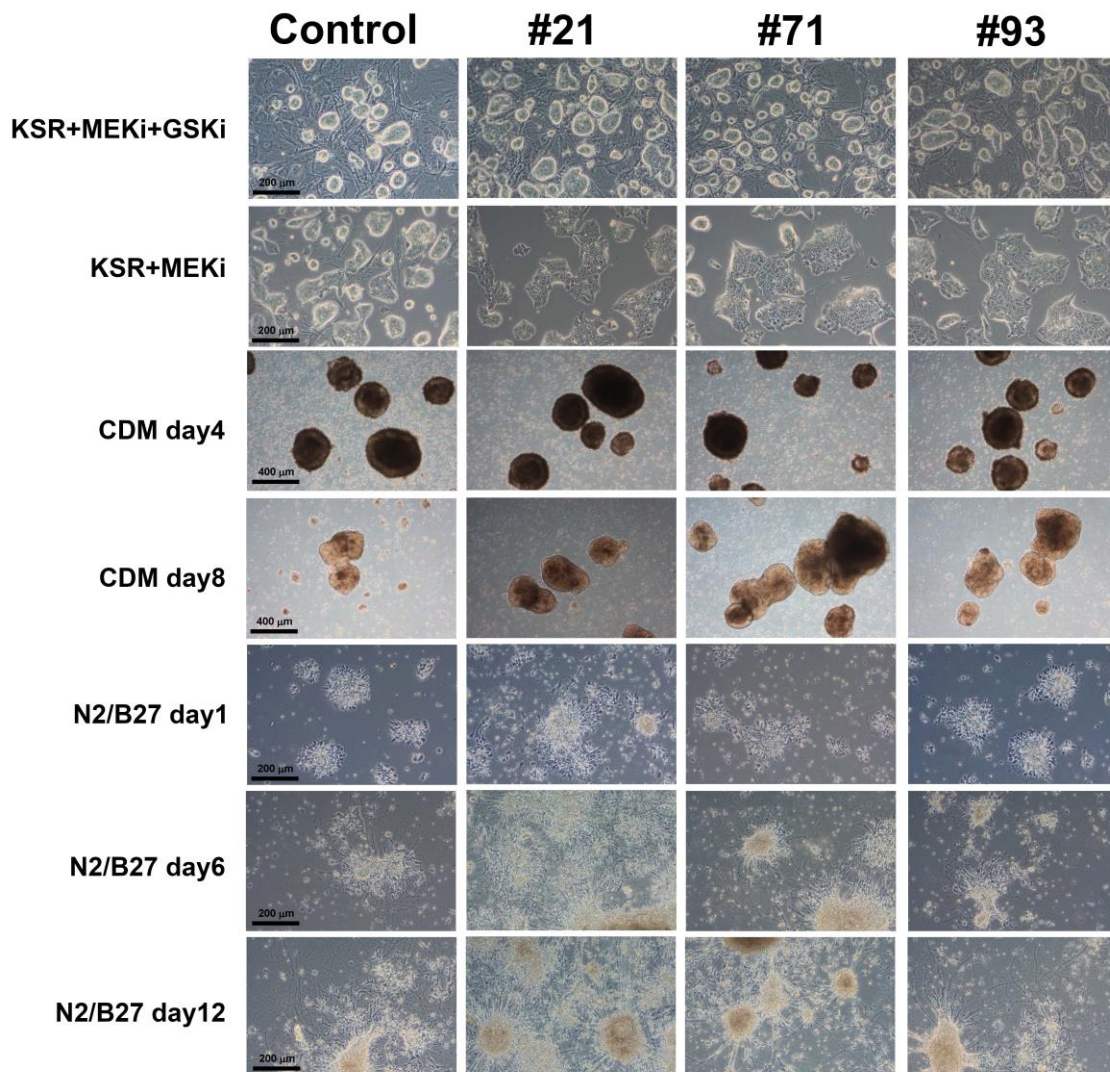

**Figure S7**

**Figure S7. Phase-contrast view of *miR-124a-1/2/3* TKO cells during induced neuronal differentiation.**

Neuronal differentiation from the control and *miR-124a-1/2/3* TKO ES cells was induced as shown in Figure 4B. 2i, MEKi and GSKi.

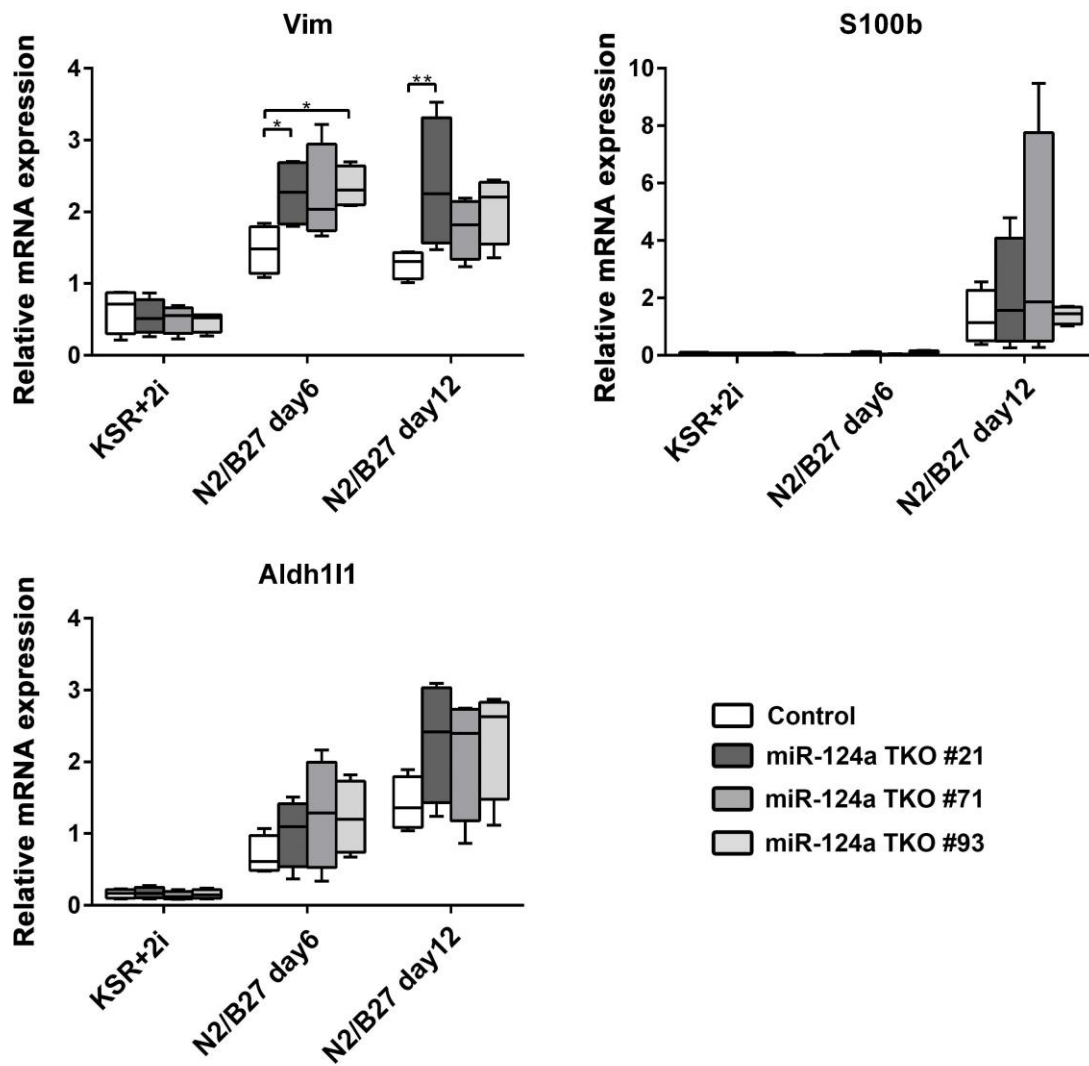

**Figure S8**

**Figure S8. Gene expression analysis of glial markers in neuronal differentiation-induced *miR-124a-1/2/3* TKO cells.**

Expression levels of genes for glial markers (*Vim*, *S100b*, and *Aldh111*) in *miR-124a-1/2/3* TKO cells at the indicated time points were analyzed. RNA was purified from cells cultured in ES medium (KSR+2i), and neuronal differentiation medium (N2/B27) for 6 or 12 days. Box-whisker plots present the median (center line),  $\pm 1.5$  interquartile range

(box) and minimal and maximal values (whiskers). \* $p < 0.05$ , \*\* $p < 0.01$  (two-way ANOVA followed by Bonferroni test),  $n = 4$  per cell line. 2i, MEKi and GSKi.

**Table S1. Sequences of DNA oligonucleotides (5' → 3')**

| <b>Southern blotting probe</b> | <b>Sequence</b>                              | <b>Reference</b> |
|--------------------------------|----------------------------------------------|------------------|
| miR-124a-2 5probe 51           | GAAGTTGCACCTCTCCAGTGTCCAGTG                  |                  |
| miR-124a-2 5probe 31           | GTCACACTGATAACATCCCTCAGTGCTC                 |                  |
| miR-124a-2 3probe 51           | GCTTCTACCCTGAAGACATAGACATG                   |                  |
| miR-124a-2 3probe 31           | AGCAGAAGTAGAAATCGGCTTCTCTCAG                 |                  |
| miR-124a-3 5probe 51           | ATTTCTGCCCGCTCGAGAGCACAGCTC                  |                  |
| miR-124a-3 5probe 31           | GCAGTGAGGAAGGATGGCTTGGGCCATG                 |                  |
| miR-124a-3 3probe 51           | CGATGTTGTCCACGACTCCGTACAGGCA                 |                  |
| miR-124a-3 3probe 31           | GCTCACAGCTGTCTATGGGCAAGCTGTC                 |                  |
| <b>qPCR primer</b>             |                                              |                  |
| NeuroD1-F                      | TCCAGGGTTATGAGATCGTCA                        |                  |
| NeuroD1-R                      | TCGCTGTATGATTTGGTCATG                        |                  |
| GAD2-F                         | GTGGAAGCTGAGTGGAGTAGAGAG                     |                  |
| GAD2-R                         | GTCTCCTGTGTCATAGGACAGGTC                     |                  |
| Vglut1-F                       | TGCCAGCATCTTGATGGGCATTTTC                    |                  |
| Vglut1-R                       | CTATGAGGAACACGTAAGTCCAC                      |                  |
| Gfap-F                         | GTTAAGCTAGCCCTGGACATCGAG                     |                  |
| Gfap-R                         | GATCTGGAGGTTGGAGAAAGTCTG                     |                  |
| Nanog-F                        | GAAGTCTCCTCATTCTGAACCTG                      |                  |
| Nanog-R                        | AGACCATTGCTAGTCTTCAACCAC                     |                  |
| Tuj1-F                         | GACTTGGAACTGGAACCATGGAC                      |                  |
| Tuj1-R                         | CAGTTGTTGCCAGCACCCTCTGA                      |                  |
| Map2-F                         | GACAATGCTCACCAGTACCTGGA                      |                  |
| Map2-R                         | GATGATCTCAGCCCCGTGATCTAC                     |                  |
| Itgb1-F                        | AGGTCGATCCTGTGACCCATTGCA                     |                  |
| Itgb1-R                        | GAACAATTCAGCAACCACGCCTG                      |                  |
| mVim-QPCR-51                   | GGAGATGCTCCAGAGAGAGGAAG                      |                  |
| mVim-QPCR-31                   | CAAGGATTCACCTTTCCGTTCAAG                     |                  |
| mS100b-QPCR-51                 | AGCACAAGCTGAAGAAGTCAGAAC                     |                  |
| mS100b-QPCR-31                 | CACCACTTCTGCTCCTTGATTTTC                     |                  |
| mAldh111-QPCR-51               | TTTCTTCAACAAAGGGGAGAACTG                     |                  |
| mAldh111-QPCR-31               | GTTGCCGATTTTCACTTCCCTAC                      |                  |
| mTardbp-QPCR-51                | GTGTGACTGTAAACTTCCCAACTC                     |                  |
| mTardbp-QPCR-31                | TACAACGTCCAACAACACCTTTTC                     |                  |
| mSrebf2-QPCR-51                | ATCCTACCAAGCACACTGATTGAG                     |                  |
| mSrebf2-QPCR-31                | CAGACTCTGGGCACGATTTAAGAA                     |                  |
| mNupr1-QPCR-51                 | GAATATGATCAGTACAGCCTGGC                      | 46               |
| mNupr1-QPCR-31                 | CAGATTTCTGGAACCTTGGTCAGC                     | 46               |
| mKlf6-QPCR-51                  | ACCCGACATGGATGTGCTCCCAAT                     | 47               |
| mKlf6-QPCR-31                  | GCAGGGCTCACTCTGAAGATA                        | 47               |
| Rpl4-F                         | GATATGCCATCTGTTCTGCCCT                       |                  |
| Rpl4-R                         | CTTGCCAGCTCTCATTCTCTGA                       |                  |
| <b>Construct</b>               |                                              |                  |
| mTardbp-ORF-Sall-51            | GGGGTTCGACATGTCTGAATATATTCGGGTAACAGAA        |                  |
| mTardbp-ORF-NotI-31            | GGGGCGGCCGCTACATTCCCAGCCAGAAGACTTAGA         |                  |
| <b>CRISPR</b>                  |                                              |                  |
| mir124-1-sgRNA-F               | GTCGACTAATACGACTCACTATAGGTCCATACAATTAAGGCACG |                  |
| mir124-2-sgRNA-F               | GTCGACTAATACGACTCACTATAGTGTACATAATTAAGGCACG  |                  |
| mir124-3-sgRNA-F               | GTCGACTAATACGACTCACTATAGGTCTATACAATTAAGGCACG |                  |
| sgRNA-R                        | GGATCCAAAAGCACCGACTCGGTGCC                   |                  |
| <b>Genotyping</b>              |                                              |                  |
| miR-124a-2-tail-F              | TAGGTGCGCTGTAAATGGCATG                       |                  |
| miR-124a-2-tail-R              | TGAATCAATGCGAGGGTCTCT                        |                  |
| miR-124a-3-tail-F              | GTGATACTCATGACATCCCTTCGT                     |                  |
| miR-124a-3-tail-R              | TCTGCGTGTTCACAGCGGACCTTGAT                   |                  |
| pPNT-lox-neo-F                 | ATATGATCGGAATTGGTCTCCCG                      |                  |
